# Supplementary material for: Intestinal Helminths in Wild Rodents from Native Forest and Exotic Pine Plantations (Pinus radiata) in Central Chile
Source: PubMed Central journal article supplement (PMC7913297; doi:10.3390/ani11020384), 2021-02-03
Supplement: animals-11-00384-s001.pdf [file animals-11-00384-s001.pdf]

**Table 1.** Comparison of models used to test the effect of independent variables (habitat type, season and rodent hosts) on individual positivity for helminths in rodents according to their AICc values. Models also include degrees of freedom (df), AICc differences ( $\Delta$ AICc) and Akaike weights ( $w_r$ ).

| Models                     | df | AICc  | $\Delta$ AICc | $w_r$ |
|----------------------------|----|-------|---------------|-------|
| Season + species           | 6  | 930.0 | 0.00          | 0.729 |
| Species                    | 3  | 933.5 | 3.48          | 0.128 |
| Habitat + season + species | 8  | 933.7 | 3.65          | 0.118 |
| Habitat + species          | 5  | 937.2 | 7.18          | 0.020 |
| Season                     | 4  | 940.5 | 10.46         | 0.004 |
| Habitat + season           | 6  | 943.0 | 13.04         | 0.001 |

**Table S2.** Comparison of models used to test the effect of independent variables (habitat type, season and rodent species) on individual positivity for *Hymenolepis* sp. in rodents according to their AICc values. Models also include degrees of freedom (df), AICc differences ( $\Delta$ AICc) and Akaike weights ( $w_r$ ).

| Models                     | df | AICc  | $\Delta$ AICc | $w_r$ |
|----------------------------|----|-------|---------------|-------|
| Species                    | 3  | 482.1 | 0.00          | 0.731 |
| Species + habitat          | 5  | 485.2 | 3.19          | 0.149 |
| Species + season           | 6  | 487.3 | 5.29          | 0.052 |
| Habitat                    | 3  | 488.6 | 6.56          | 0.028 |
| Habitat + season + species | 8  | 490.3 | 8.25          | 0.012 |

**Table S3.** Comparison of models used to test the effect of independent variables (habitat type, season and rodent species) on individual positivity for *Physaloptera* sp. in rodents according to their AICc values. Models also include degrees of freedom (df), AICc differences ( $\Delta$ AICc) and Akaike weights ( $w_r$ ).

| Models                     | df | AICc  | $\Delta$ AICc | $w_r$ |
|----------------------------|----|-------|---------------|-------|
| Season + species           | 6  | 301.9 | 0.00          | 0.577 |
| Season + habitat           | 6  | 304.3 | 2.38          | 0.175 |
| Habitat + season + species | 8  | 304.6 | 2.71          | 0.149 |
| Species                    | 3  | 306.2 | 4.27          | 0.068 |
| Habitat + species          | 5  | 308.7 | 6.86          | 0.019 |
| Season                     | 4  | 309.6 | 7.74          | 0.012 |
